# Supplementary material for: Can urine studies be replaced by serum free light chains measurements to assign responses in multiple myeloma patients?
Source: Frontiers journal article supplement (doi:10.3389/fonc.2022.1056293), 2022-11-30
Supplement: Data_Sheet_1.pdf [file Data_Sheet_1.pdf]

**Supplementary Table 1. Response criteria evaluated in this study**

| Response category                    | IMWG criteria                                                                                                                                                                                                                                                                                                                                                                                                                                                                                                                                                                                                                                                                                                                                                                                                                                                                                                                                               | French group criteria                                                                                                                                                                                                                                                                                                                                                                                                                                                                                                                                                                                                                                                                |
|--------------------------------------|-------------------------------------------------------------------------------------------------------------------------------------------------------------------------------------------------------------------------------------------------------------------------------------------------------------------------------------------------------------------------------------------------------------------------------------------------------------------------------------------------------------------------------------------------------------------------------------------------------------------------------------------------------------------------------------------------------------------------------------------------------------------------------------------------------------------------------------------------------------------------------------------------------------------------------------------------------------|--------------------------------------------------------------------------------------------------------------------------------------------------------------------------------------------------------------------------------------------------------------------------------------------------------------------------------------------------------------------------------------------------------------------------------------------------------------------------------------------------------------------------------------------------------------------------------------------------------------------------------------------------------------------------------------|
| Stringent complete response (sCR)    | CR as defined below plus normal sFLCr and absence of clonal cells in BM by immunohistochemistry or 2–4-colour flow cytometry                                                                                                                                                                                                                                                                                                                                                                                                                                                                                                                                                                                                                                                                                                                                                                                                                                | CR as defined below plus absence of clonal cells in BM by immunohistochemistry or 2–4-colour flow cytometry                                                                                                                                                                                                                                                                                                                                                                                                                                                                                                                                                                          |
| Complete response (CR)               | Negative sIFE and uIFE, disappearance of any soft tissue plasmacytomas and ≤5% plasma cells in BM                                                                                                                                                                                                                                                                                                                                                                                                                                                                                                                                                                                                                                                                                                                                                                                                                                                           | Negative sIFE, normal sFLCr, disappearance of any soft tissue plasmacytomas and ≤5% plasma cells in BM                                                                                                                                                                                                                                                                                                                                                                                                                                                                                                                                                                               |
| Very good partial response (VGPR)    | Serum and urine M-protein detectable by IFE but not on SPEP/UPEP or ≥90% reduction in serum M-protein plus urine M-protein level < 100 mg/24 h                                                                                                                                                                                                                                                                                                                                                                                                                                                                                                                                                                                                                                                                                                                                                                                                              | Serum M-protein detectable by sIFE but not on SPEP or ≥90% reduction in serum M-protein and abnormal sFLCr and ≥90% reduction in dFLC levels                                                                                                                                                                                                                                                                                                                                                                                                                                                                                                                                         |
| Partial response (PR)                | ≥50% reduction of serum M-protein and reduction in 24-h urinary M-protein by ≥90% or to <200 mg/24 h                                                                                                                                                                                                                                                                                                                                                                                                                                                                                                                                                                                                                                                                                                                                                                                                                                                        | ≥50% reduction of serum M-protein and abnormal FLC ratio and ≥50% reduction in dFLC levels                                                                                                                                                                                                                                                                                                                                                                                                                                                                                                                                                                                           |
| Stable disease (SD)                  | Not meeting criteria for CR, VGPR, PR, PD or RCR                                                                                                                                                                                                                                                                                                                                                                                                                                                                                                                                                                                                                                                                                                                                                                                                                                                                                                            | Not meeting criteria for CR, VGPR, PR, PD or RCR                                                                                                                                                                                                                                                                                                                                                                                                                                                                                                                                                                                                                                     |
| Progressive disease (PD)             | Requires any one or more of the following: <ul style="list-style-type: none"> <li>• Increase of ≥25% from lowest response in serum M-protein (the absolute increase must be ≥5 g/L) and/or urine M-protein (the absolute increase must be ≥200 mg/24 h).</li> <li>• Only in patients without measurable serum and urine M-protein levels: dFLC levels (the absolute increase must be &gt;100 mg/L)</li> <li>• Only in patients without measurable serum and urine M-protein levels and without measurable disease by FLC levels: BM plasma cell percentage (absolute percentage must be ≥10%)</li> <li>• Definitive development of new bone lesions or soft tissue plasmacytomas or definite increase in the size of existing bone lesions or soft tissue plasmacytomas</li> <li>• Development of hypercalcaemia (corrected serum calcium &gt;11.5 mg/dL or 2.65 mmol/L) that can be attributed solely to the plasma cell proliferative disorder</li> </ul> | Requires any one or more of the following: <ul style="list-style-type: none"> <li>• Increase of ≥25% from lowest response in serum M-protein (the absolute increase must be ≥5 g/L) and/or dFLC levels (the absolute increase must be &gt;100 mg/L)</li> <li>• BM plasma cell percentage (the absolute % must be ≥10%)</li> <li>• Definitive development of new bone lesions or soft tissue plasmacytomas or definite increase in the size of existing bone lesions or soft tissue plasmacytomas</li> <li>• Development of hypercalcaemia (corrected serum calcium &gt;11.5 mg/dL or 2.65 mmol/L) that can be attributed solely to the plasma cell proliferative disorder</li> </ul> |
| Relapse from complete response (RCR) | Any one or more of the following criteria: <ul style="list-style-type: none"> <li>• Reappearance of serum or urine M-protein by immunofixation or electrophoresis</li> <li>• Development of ≥5% plasma cells in the BM</li> <li>• Appearance of any other sign of progression (ie, new plasmacytoma, lytic bone lesion, or hypercalcaemia see above)</li> </ul>                                                                                                                                                                                                                                                                                                                                                                                                                                                                                                                                                                                             | Any one or more of the following criteria: <ul style="list-style-type: none"> <li>• Reappearance of M-protein by SPEP, sIFE or abnormal sFLCr</li> <li>• Development of ≥5% plasma cells in the BM</li> <li>• Appearance of any other sign of progression (ie, new plasmacytoma, lytic bone lesion, or hypercalcaemia see above)</li> </ul>                                                                                                                                                                                                                                                                                                                                          |

BM: bone marrow; dFLC: the difference between involved and uninvolved serum free light chains; M-protein: monoclonal protein; sFLCr: serum free light chain ratio; sIFE: serum immunofixation electrophoresis; SPEP: serum protein electrophoresis; uIFE: urine immunofixation electrophoresis; UPEP: urine protein electrophoresis.

**Supplementary Table 2. Patient characteristics at diagnosis.**

| <b>N=100</b>                     |         |            |
|----------------------------------|---------|------------|
| <b>Median age, years (range)</b> |         | 68 (36-88) |
| <b>Sex, n (%)</b>                |         |            |
|                                  | Male    | 54 (54)    |
|                                  | Female  | 46 (46)    |
| <b>ISS, n (%)</b>                |         |            |
|                                  | I       | 27 (27)    |
|                                  | II      | 33 (33)    |
|                                  | III     | 40 (40)    |
| <b>Immunotype, n (%)</b>         |         |            |
|                                  | IgG     | 55 (55)    |
|                                  | IgA     | 25 (25)    |
|                                  | IgM     | 1 (1)      |
|                                  | IgD     | 1 (1)      |
|                                  | kappa   | 7 (7)      |
|                                  | lambda  | 11 (11)    |
| <b>Treatment, n (%)</b>          |         |            |
|                                  | ASCT    | 36 (36)    |
|                                  | No ASCT | 64 (64)    |

ASTC: Autologous stem cell transplantation; ISS: International Stage System.

Supplementary Table 3. Concordance between all the evaluated responses assigned by the IMWG criteria and the French group criteria in all patients and only in LCMM patients.

| All patients                                             |      |               |     |    |    |    |      |    |       |
|----------------------------------------------------------|------|---------------|-----|----|----|----|------|----|-------|
|                                                          |      | IMWG criteria |     |    |    |    |      |    | Total |
|                                                          |      | RCR           | PD  | SD | MR | PR | VGPR | CR |       |
| French group criteria                                    | RCR  | 21            | 0   | 0  | 0  | 1  | 1    | 3  | 26    |
|                                                          | PD   | 6             | 58  | 0  | 1  | 0  | 0    | 0  | 65    |
|                                                          | SD   | 0             | 0   | 4  | 2  | 1  | 1    | 0  | 9     |
|                                                          | MR   | 0             | 0   | 0  | 8  | 1  | 0    | 0  | 9     |
|                                                          | PR   | 0             | 1   | 1  | 2  | 56 | 3    | 1  | 65    |
|                                                          | VGPR | 0             | 0   | 0  | 1  | 1  | 35   | 6  | 42    |
|                                                          | CR   | 4             | 0   | 0  | 0  | 0  | 6    | 69 | 79    |
| Total                                                    |      | 31            | 59  | 5  | 14 | 60 | 46   | 79 | 294   |
| Concordance (%)                                          |      | 68            | 98  | 80 | 57 | 93 | 76   | 87 | 85    |
| Kappa with Quadratic Weighting (IC 95%)= 0.9 (0.78-0.96) |      |               |     |    |    |    |      |    |       |
| LCMM patients                                            |      |               |     |    |    |    |      |    |       |
|                                                          |      | IMWG criteria |     |    |    |    |      |    | Total |
|                                                          |      | RCR           | PD  | SD | MR | PR | VGPR | CR |       |
| French group criteria                                    | RCR  | 3             | 0   | 0  | 0  | 0  | 1    | 2  | 6     |
|                                                          | PD   | 2             | 10  | 0  | 0  | 0  | 0    | 0  | 12    |
|                                                          | SD   | 0             | 0   | 0  | 0  | 1  | 0    | 0  | 1     |
|                                                          | MR   | 0             | 0   | 0  | 1  | 0  | 0    | 0  | 1     |
|                                                          | PR   | 0             | 0   | 1  | 2  | 1  | 1    | 1  | 7     |
|                                                          | VGPR | 0             | 0   | 0  | 0  | 1  | 5    | 5  | 10    |
|                                                          | CR   | 2             | 0   | 0  | 0  | 0  | 2    | 16 | 20    |
| Total                                                    |      | 7             | 10  | 1  | 3  | 3  | 9    | 24 | 57    |
| Concordance (%)                                          |      | 43            | 100 | 0  | 33 | 33 | 56   | 67 | 63    |
| Kappa with Quadratic Weighting (IC 95%)= 0.7 (0.45-0.91) |      |               |     |    |    |    |      |    |       |

CR: complete response; IMWG: International Myeloma Working Group; MR: minimal response; PD: progressive disease; PR: partial response; RCR: relapse from complete response; SD: stable disease; VGPR: very good partial response.
